# Supplementary material
Source: Springer Nature journal article supplement (https://www.springermedizin.de/resource/supplementary/12876_2012_747_MOESM7_ESM.pdf/9437728)

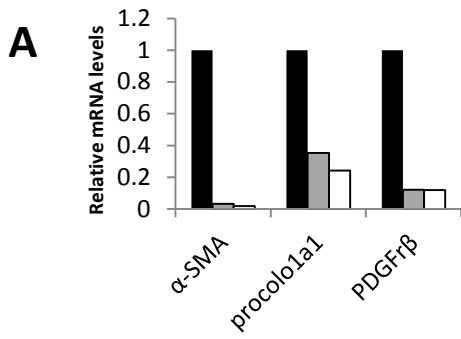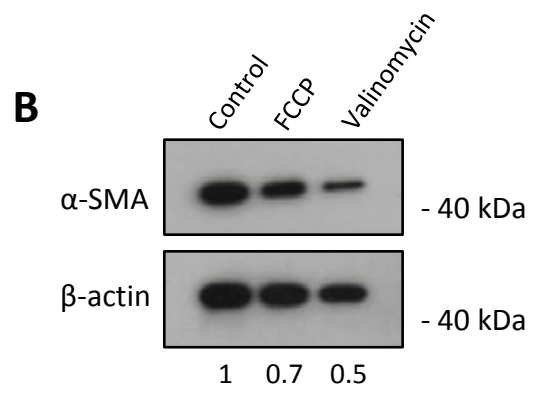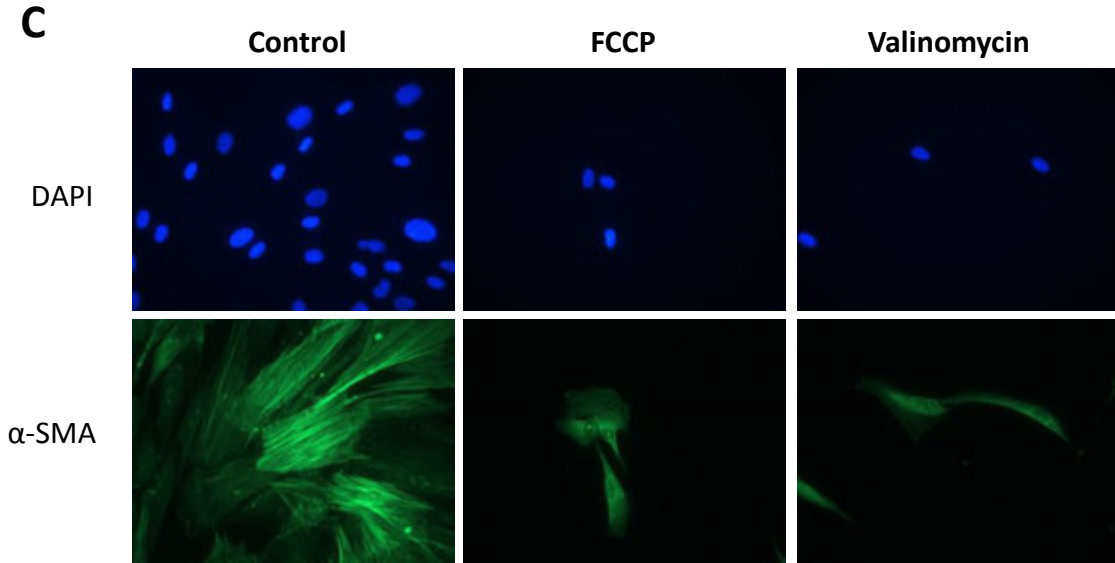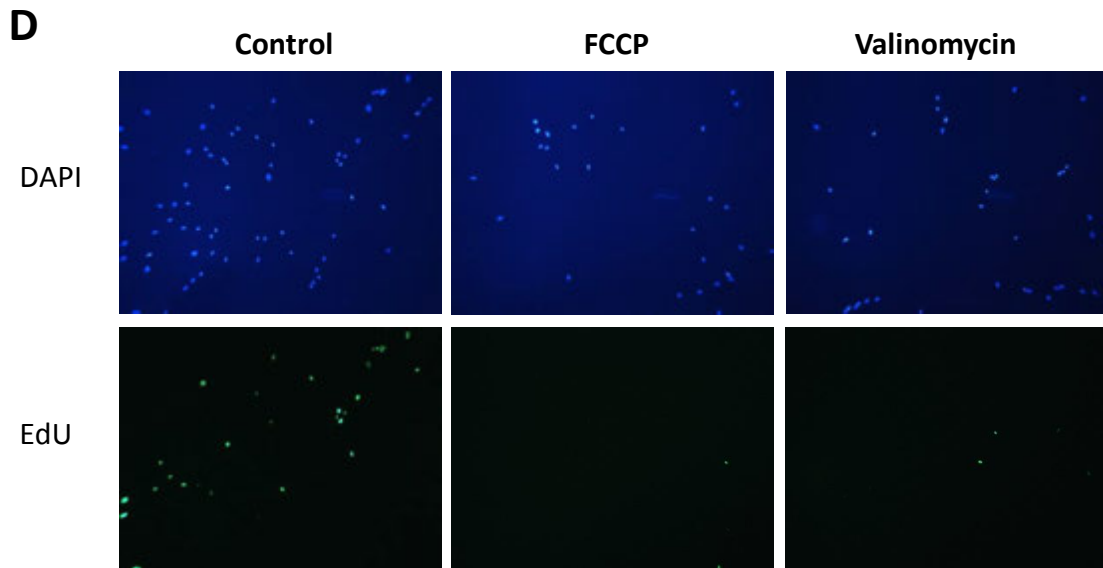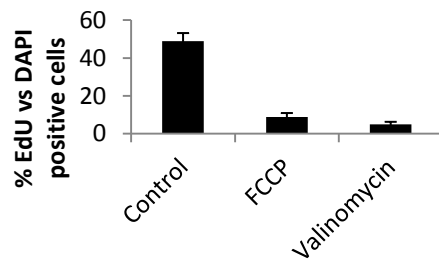

Supplement: MOESM7 [file 9437728]
